# Supplementary material for: Quality over Quantity: How Different Dispersion Qualities of Minute Amounts of Nano-Additives Affect Material Properties in Powder Bed Fusion of Polyamide 12
Source: MDPI journal article supplement (doi:10.3390/ma14185322), 2021-09-15
Supplement: s1 [file s1]

## Supplementary information

Figure S1 shows the nominal and measured output laser power of the CO<sub>2</sub> laser from the EOSINT P385 LB-PBF-P machine.

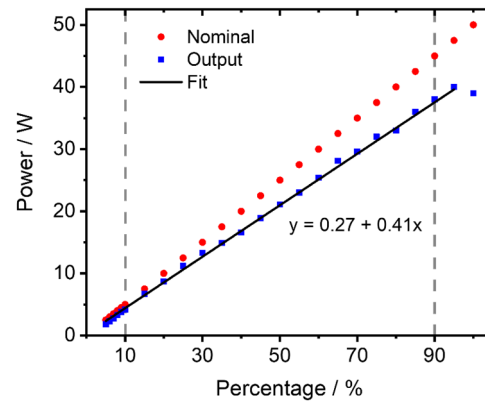

**Figure S1.** Nominal and measured laser power. Nominal and measured output laser power of LB-PBF-P machine EOSINT P385.

The process parameters used for the manufacturing of tensile and square specimens are listed in Table S1.

**Table S1.** Process parameters for LB-PBF-P. EOSINT P385 process parameters for manufacturing of PA12 and composite specimens.

| Sample                       | Laser power (nominal) in W | Laser power (output) in W | Scanning speed in mm/s | Hatch distance in mm | Powder bed temperature in °C | Energy density in J/mm <sup>3</sup> |
|------------------------------|----------------------------|---------------------------|------------------------|----------------------|------------------------------|-------------------------------------|
| PA12                         | 33                         | 27                        | 4500                   | 0.4                  | 171                          | 0.150                               |
| PA12 + 0.005 vol% CNP (Coll) | 33                         | 27                        | 4500                   | 0.4                  | 171                          | 0.150                               |
| PA12 + 0.005 vol% CNP (DC)   | 33                         | 27                        | 4500                   | 0.4                  | 171                          | 0.150                               |
| PA12 + 0.05 vol% CNP (Coll)  | 25                         | 21                        | 4500                   | 0.4                  | 169                          | 0.115                               |
| PA12 + 0.05 vol% CNP (DC)    | 28                         | 23                        | 4500                   | 0.4                  | 169                          | 0.127                               |
| PA12 + 0.05 vol% Ag (Coll)   | 33                         | 27                        | 4500                   | 0.4                  | 172                          | 0.150                               |

The powder properties of PA12 and composites, which are relevant for the powder recoating process in LB-PBF-P, are summarized in Table S2.

**Table S2.** Powder properties. Properties of PA12 powders and composites.

| Sample                     | Particle size distribution ( $x_{\text{area}}$ ; area of particle projection) in $\mu\text{m}$ |                |                | Hausner ratio   | Flow function ffc |
|----------------------------|------------------------------------------------------------------------------------------------|----------------|----------------|-----------------|-------------------|
|                            | x10,3                                                                                          | x50,3          | x90,3          |                 |                   |
| PA12 (washed)              | 44.2 $\pm$ 0.9                                                                                 | 59.4 $\pm$ 1.0 | 77.3 $\pm$ 0.5 | 1.14 $\pm$ 0.02 | 12.3 $\pm$ 1.0    |
| PA12 + 0.005 vol% CNP Coll | 43.6 $\pm$ 0.6                                                                                 | 58.6 $\pm$ 0.4 | 76.5 $\pm$ 0.4 | 1.12 $\pm$ 0.01 | 15.2 $\pm$ 1.5    |
| PA12 + 0.05 vol% CNP Coll  | 44.3 $\pm$ 0.4                                                                                 | 59.2 $\pm$ 0.9 | 75.9 $\pm$ 0.9 | 1.11 $\pm$ 0.02 | 12.4 $\pm$ 1.8    |
| PA12 + 0.05 vol% Ag Coll   | 43.4 $\pm$ 1.0                                                                                 | 58.6 $\pm$ 0.8 | 75.0 $\pm$ 0.5 | 1.13 $\pm$ 0.01 | 14.3 $\pm$ 1.1    |
| PA12 (virgin)              | 43.7 $\pm$ 0.8                                                                                 | 58.4 $\pm$ 0.9 | 74.9 $\pm$ 1.2 | 1.10 $\pm$ 0.03 | 17.2 $\pm$ 0.7    |
| PA12 + 0.005 vol% CNP DC   | 44.4 $\pm$ 1.4                                                                                 | 58.8 $\pm$ 0.5 | 77.2 $\pm$ 2.1 | 1.14 $\pm$ 0.01 | 9.0 $\pm$ 0.9     |
| PA12 + 0.05 vol% CNP DC    | 41.5 $\pm$ 0.4                                                                                 | 58.1 $\pm$ 0.6 | 75.8 $\pm$ 0.5 | 1.10 $\pm$ 0.02 | 8.3 $\pm$ 0.6     |

A summary of the lattice spacings of additively manufactured specimens measured by XRD can be found in Table S3.

**Table S3.** d-spacings (from XRD) of the manufactured specimens. Observed lattice spacings for the 100, 002 and 020 orientations for  $\gamma$  PA12 in composite specimens.

| Material composition       | d <sub>100</sub> in nm | d <sub>002</sub> in nm | d <sub>020</sub> in nm |
|----------------------------|------------------------|------------------------|------------------------|
| PA12                       | 0.415                  | 0.407                  | 1.591                  |
| PA12 + 0.005 vol% CNP Coll | 0.414                  | 0.406                  | 1.594                  |
| PA12 + 0.05 vol% CNP Coll  | 0.408                  | 0.415                  | 1.580                  |
| PA12 + 0.005 vol% CNP DC   | 0.414                  | 0.406                  | 1.598                  |
| PA12 + 0.05 vol% CNP DC    | 0.414                  | 0.407                  | 1.584                  |
